# Supplementary material
Source: PubMed Central journal article supplement (PMC7504936)
Supplement: supp_RA120.012852_158530_3_supp_570293_qdy2qv.pdf [file supp_RA120.012852_158530_3_supp_570293_qdy2qv.pdf]

Ligand-independent EGFR oligomers do not rely on the active state asymmetric kinase dimer

**SUPPORTING INFORMATION**

**Patrick O. Byrne<sup>1,2</sup>, Kalina Hristova<sup>3</sup> and Daniel J. Leahy<sup>2\*</sup>**

From the <sup>1</sup>Department of Biophysics and Biophysical Chemistry, Johns Hopkins University School of Medicine, Baltimore MD 21205; <sup>2</sup>Department of Molecular Biosciences, College of Natural Sciences, The University of Texas at Austin, Austin TX 78712; <sup>3</sup>Department of Materials Science and Engineering, Whiting School of Engineering, Johns Hopkins University, Baltimore MD 21218

**Figure S1.** Schematic diagrams of EGFR/ERB1 and HER2/ERBB2 proteins used for FRET studies

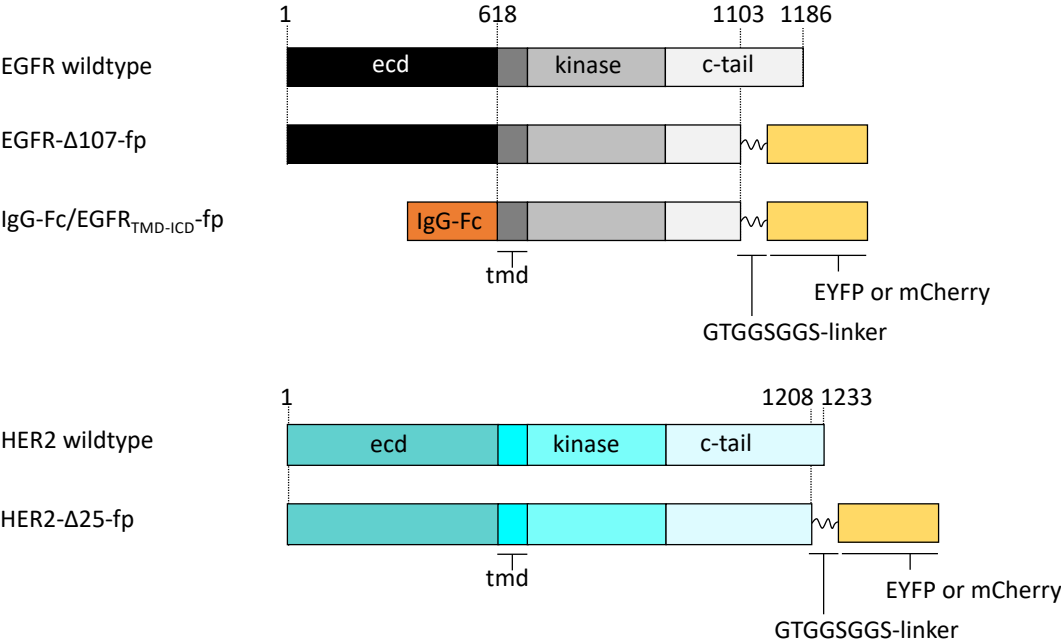

**Supplementary Figure S2.** Uncorrected FRET efficiency for EGFR homo-oligomerization

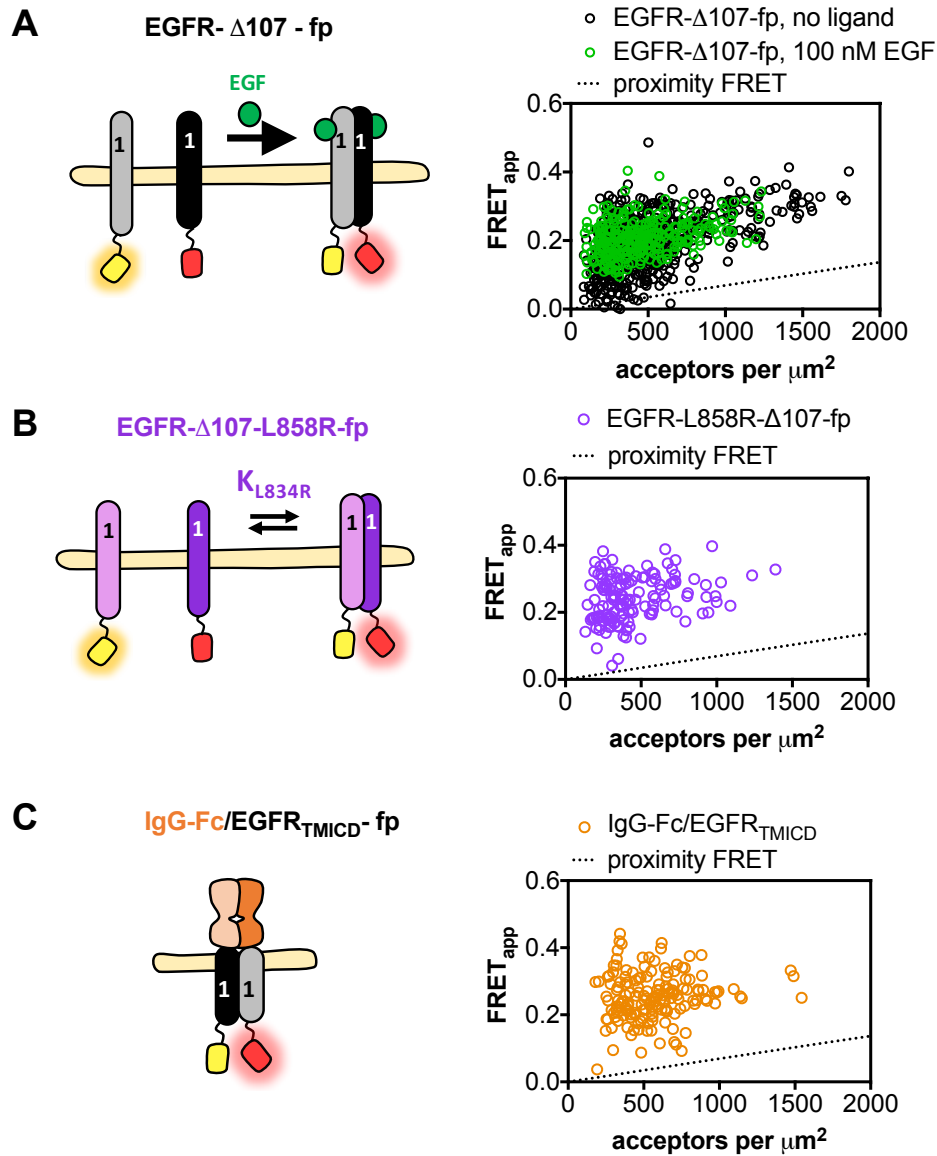

**Supplementary Figure S2.** Uncorrected FRET efficiency for EGFR- $\Delta$ 107-fp wildtype (A), EGFR- $\Delta$ 107-L858R-fp (B) and IgG-Fc/EGFR<sub>TMICD</sub>-fp (C). The same data were used to generate these graphs and the graphs in Figure 2. Cartoons are the same as those in Figure 2. Each open circle in the graphs shows the FRET efficiency for a single vesicle. The y-axis shows the apparent FRET efficiency, the x-axis shows the number of acceptor molecules per square micron. The dotted line represents the theoretical FRET efficiency that would occur due to random proximity.

Supplementary Figure S3. Uncorrected FRET efficiency for HER2 homo- and hetero-oligomerization

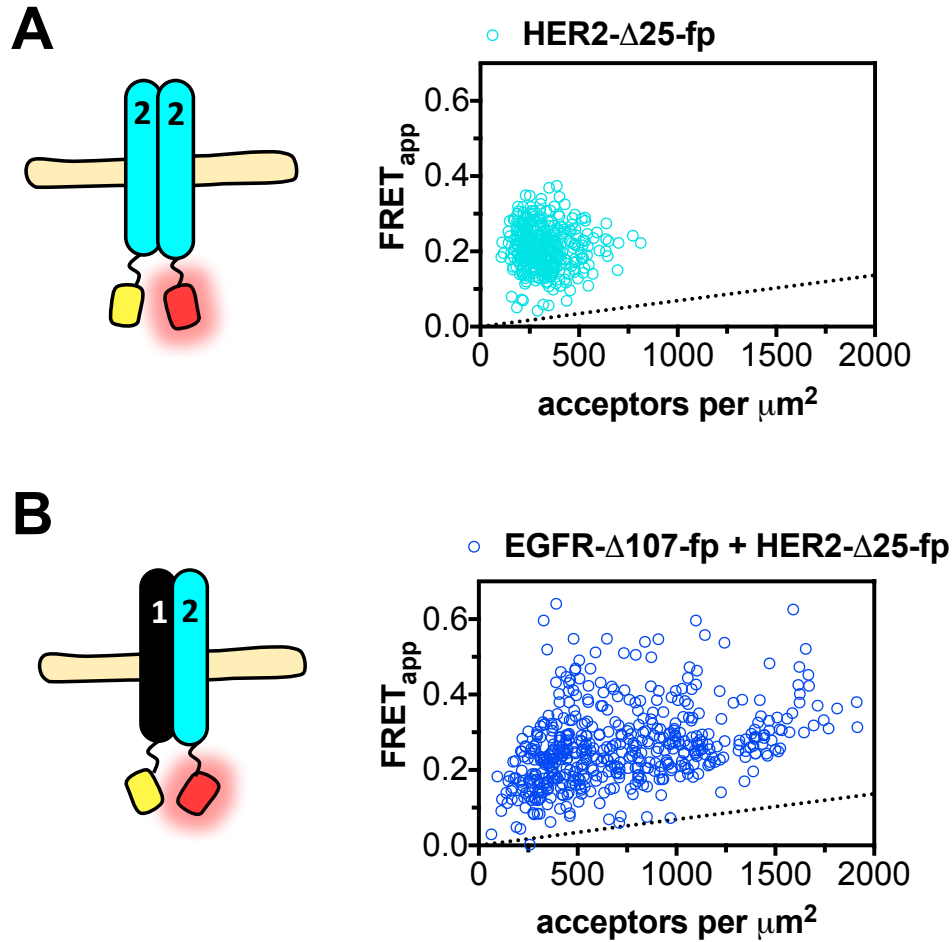

Supplementary Figure S3. Uncorrected FRET efficiency for HER2- $\Delta$ 25-fp wildtype (A) and (B) HER2- $\Delta$ 25-fp co-expressed with EGFR- $\Delta$ 107-fp. The same data were used to generate these graphs and the graphs in Figure 3. Cartoons are the same as those in Figure 3. Each open circle in the graphs shows the FRET efficiency for a single vesicle. The y-axis shows the apparent FRET efficiency, the x-axis shows the number of acceptor molecules per square micron. The dotted line represents the theoretical FRET efficiency that would occur due to random proximity.

**Supplementary Figure S4.** Uncorrected FRET efficiency for the EGFR variants I706Q and V948R

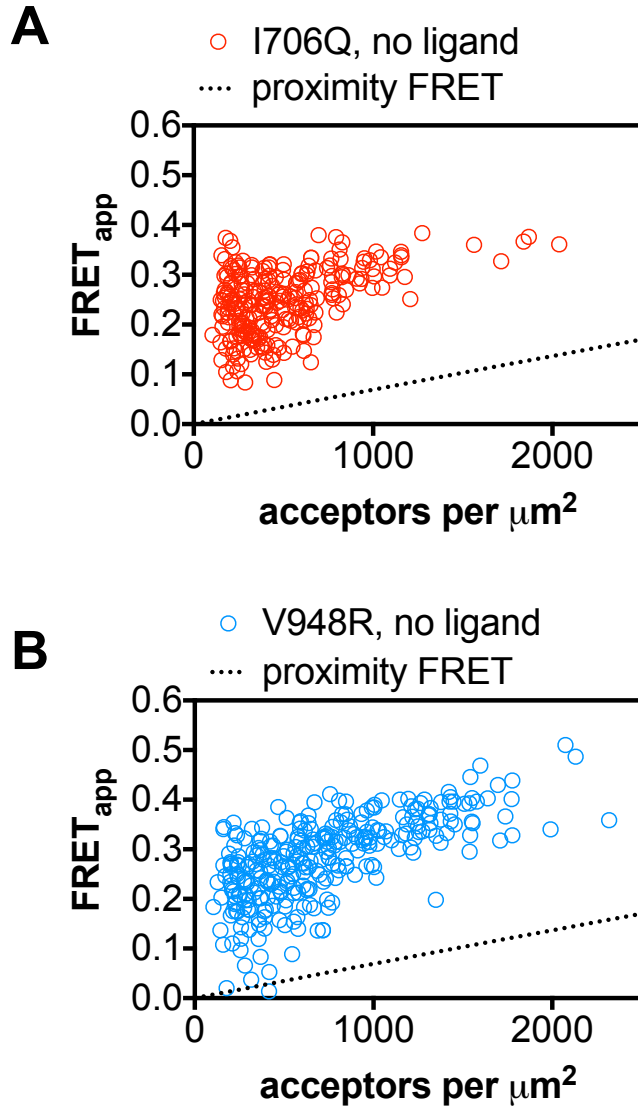

**Supplementary Figure S4.** Uncorrected FRET efficiency for the EGFR- $\Delta$ 107-fp variants I706Q (A) and V948R (B). The same data were used to generate these graphs and the graphs in Figure 5. Each open circle in the graphs shows the FRET efficiency for a single vesicle. The y-axis shows the apparent FRET efficiency, the x-axis shows the number of acceptor molecules per square micron. The dotted line represents the theoretical FRET efficiency that would occur due to random proximity.

**Supplementary Figure S5.** Substitution of the mouse IgG-Fc domain for the EGFR extracellular domain results in a constitutively phosphorylated chimeric receptor

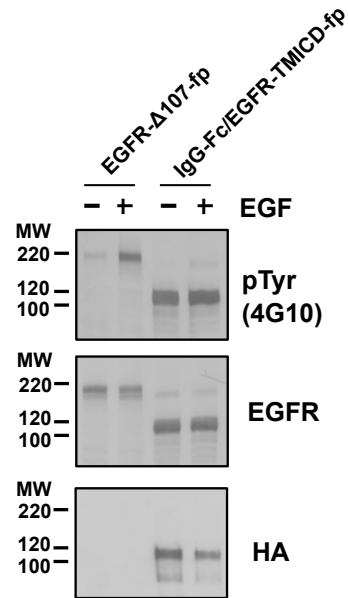

**Supplementary Figure S5.** Western blot analysis of CHO cell lysates after transient transfection and treatment with EGF. The indicated plasmid constructs are indicated above the western blots. Antibodies are indicated to the right of each blot, molecular weight markers (kDa) indicated to the left. The blots are representative of three independent biological experiments.

**Supplementary Table S1.** Previously reported fractions of preformed EGFR dimers

| <b>Cell Line</b> | <b>Expression Level (receptors per cell)</b> | <b>Oligomeric Fraction (%)</b> | <b>Expression method</b>       | <b>Label</b>  | <b>Methodology</b>                                   | <b>Reference</b> |
|------------------|----------------------------------------------|--------------------------------|--------------------------------|---------------|------------------------------------------------------|------------------|
| CHO              | 50,000 - 200,000                             | 0%                             | stable                         | eGFP          | Number and Brightness Analysis                       | 21               |
| A431             | did not quantify                             | 14%                            | endogenous                     | none          | FRET (lifetime decay)                                | 19               |
| CHO              | did not quantify                             | 20%                            | stable                         | eGFP          | fluorescence intensity distribution analysis         | 22               |
| CHO              | 600,000                                      | 30%                            | stable                         | eGFP          | Number and Brightness Analysis                       | 21               |
| CHO              | various, ranging from 41,000 to 660,000      | *see below                     | stable, tetracycline-inducible | none          | measurement of EGFR binding to I <sup>125</sup> -EGF | 18               |
| BaF/3            | 50,000 - 100,000                             | 55%                            | stable                         | YFP           | homo-FRET                                            | 16               |
| A431             | 6,000,000 - 8,000,000                        | 68%                            | endogenous                     | none          | chemical cross-linking                               | 20               |
| mouse fibroblast | 100,000                                      | 71%                            | stable                         | none          | chemical cross-linking                               | 20               |
| CHO              | 20,000 - 200,000                             | 68 ± 8%                        | transient                      | eGFP and eRFP | fluorescence cross-correlation spectroscopy          | 17               |

\*Using saturation binding data, Macdonald and Pike (Reference 18) determined the best fit value for the equilibrium dissociation constant for ligand-independent EGFR dimerization to be about 50,000 receptors per cell (i.e. ~50% dimer at 50,000 receptors per cell)
